# Supplementary figures and images for: Preparation and evaluation of the biosynthetic procedure of iron oxide and magnesium oxide nanoparticles using Hylocereus undatus fruit peel extract and their anticancer properties
Source: Royal Society of Chemistry journal article supplement (doi:10.1039/d4ra07411d), 2025-01-01

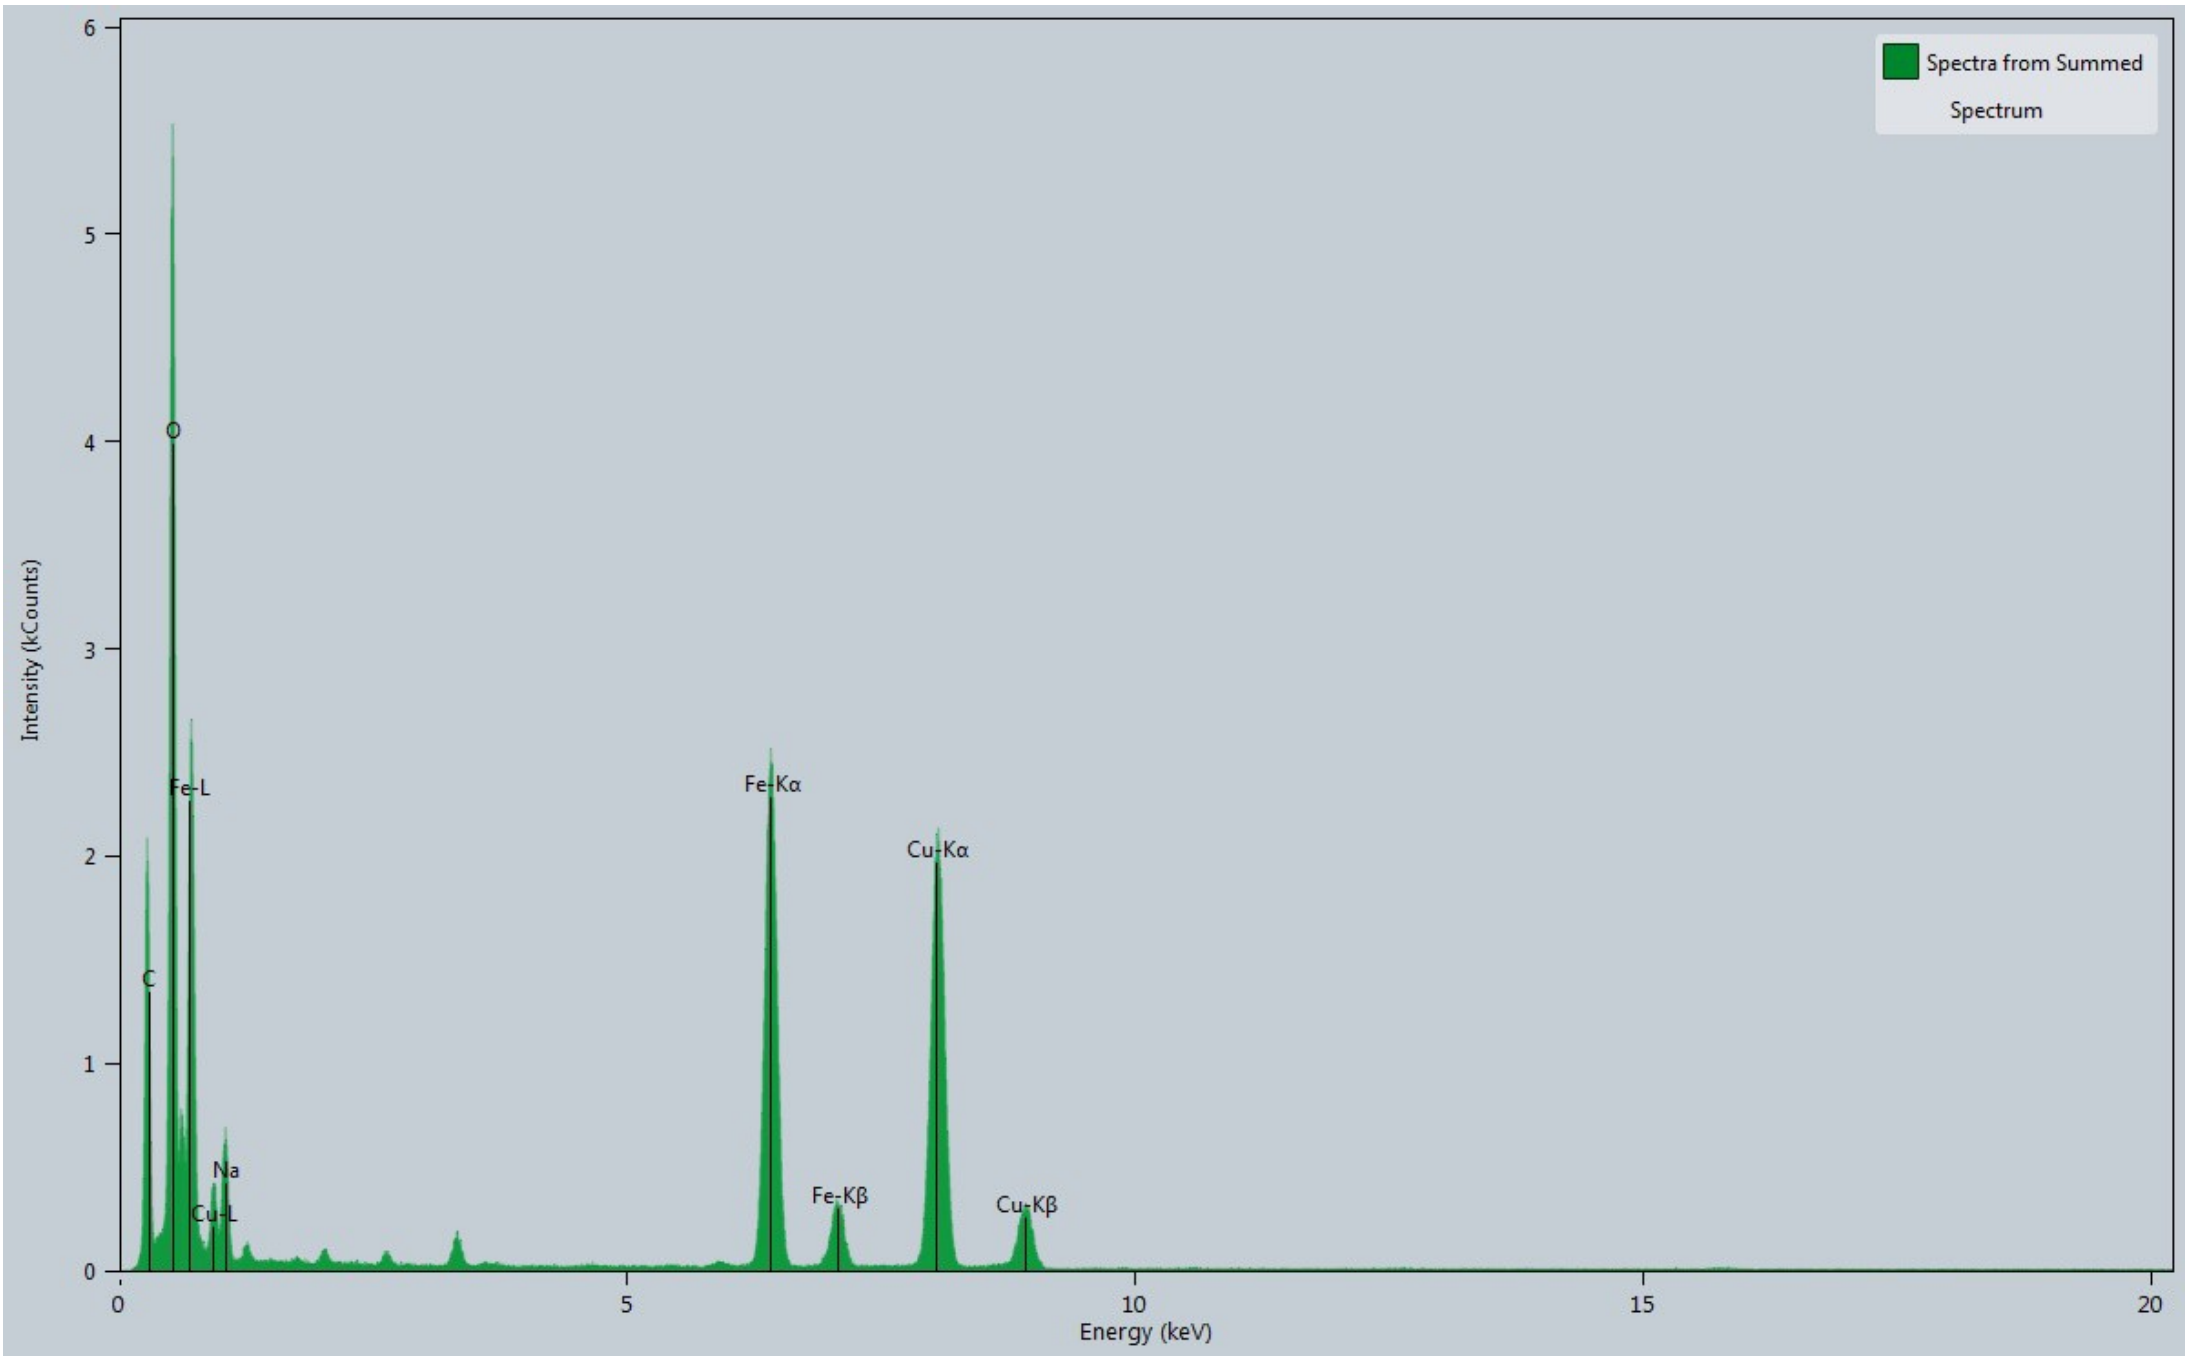

Supplement: d4ra07411d1.pdf [file d4ra07411d1.pdf]
